# Supplementary material for: A selenium-confined microporous carbon cathode for ultrastable lithium–selenium batteries
Source: Royal Society of Chemistry journal article supplement (doi:10.1039/c4ta03141e), 2014-01-01
Supplement: c4ta03141e1.pdf [file c4ta03141e1.pdf]

## Electronic Supplementary Information

---

### **Selenium-confined microporous carbon cathode for ultrastable lithium-selenium batteries**

*Yunxia Liu, Ling Si, Xiaosi Zhou,\* Xia Liu, Yan Xu, Jianchun Bao and Zhihui Dai\**

Jiangsu Key Laboratory of Biofunctional Materials,

School of Chemistry and Material Science, Nanjing Normal University,

Nanjing 210023, P. R. China

\*To whom all correspondence should be addressed. E-mail: [zhouxiaosi@njnu.edu.cn](mailto:zhouxiaosi@njnu.edu.cn);

[daizhihui@njnu.edu.cn](mailto:daizhihui@njnu.edu.cn)

## Experimental section

*Preparation of microporous carbon polyhedrons (MICP):* MICP was synthesized according to a reported method with some modification.<sup>1,2</sup> In a typical synthesis, 7.34 g of  $\text{Zn}(\text{NO}_3)_2 \cdot 6\text{H}_2\text{O}$  ( $\geq 99.0\%$ , Sigma-Aldrich) was dissolved in 500 mL of anhydrous methanol ( $\text{MeOH}$ ,  $\geq 99.5\%$ , Sinopharm Chemical Reagent Co., Ltd.) under magnetic stirring. Another solution was prepared by dissolving 8.10 g of 2-methylimidazole (99%, Sigma-Aldrich) and 4.05 g of 1-methylimidazole (99%, Alfa Aesar) in 500 mL of  $\text{MeOH}$ . Then, the later solution was poured into the former one under vigorous stirring. The resultant solution was stirred for 5 min and then kept static for 24 h at room temperature. The produced white precipitate (ZIF-8) was collected by centrifuging, washing with ethanol and drying under vacuum at 70 °C for 12 h. Afterward, the carbonization of ZIF-8 was carried out at 1000 °C for 8h under argon atmosphere. After carbonization, the as-formed black powder was washed with 1M hydrochloric acid, deionized water, ethanol, and then dried under vacuum at 70 °C for 12 h. Finally, the resulting product was activated at 600 °C for 2h under argon atmosphere to get MICP.

*Preparation of selenium@microporous carbon polyhedrons (Se@MICP):* 100 mg of Se powder (99.99%, Sigma-Aldrich) and 100 mg of the as-prepared MICP were mixed by grinding for 1 h. Subsequently, the mixture was sealed in a glass tube under vacuum and heated at 260 °C for 12 h to achieve Se@MICP. As a control sample, a physical mixture of Se and MICP (Se-MICP) was prepared by directly grinding Se and MICP with a weight ratio of 50:50 for 1 h.

*Materials characterization:* Scanning electron microscopy (SEM) measurements were conducted on a JEOL JSM-7600F scanning electron microscope operated at 10 kV. Transmission electron microscopy (TEM) and high-resolution TEM (HRTEM) characterizations were carried out on a JEOL JEM-2100F transmission electron microscope operated at 200 kV. Energy dispersive X-ray spectroscopy (EDX) analysis and scanning transmission electron

microscopy (STEM) measurements as well as elemental mapping characterizations were performed on a Tecnai G2 F20 U-TWIN field emission transmission electron microscope equipped with an EDAX system. Nitrogen adsorption and desorption isotherms at 77.3 K were determined with an ASAP 2050 surface area-pore size analyzer. X-ray photoelectron spectroscopy (XPS) measurement was recorded on an ESCALab250Xi electron spectrometer from VG Scientific using 300W Al K $\alpha$  radiation. X-ray diffraction (XRD) pattern was measured on a Rigaku D/max 2500/PC diffractometer using Cu K $\alpha$  radiation. Thermogravimetric analysis (TGA) was carried out on a NETZSCH STA 449 F3 under nitrogen flow with a heating rate of 10 °C min<sup>-1</sup>. Raman measurements were performed using a Labram HR800 with a laser wavelength of 514.5 nm.

*Electrochemical measurements:* Electrochemical experiments were carried out using CR2032 coin cells. To fabricate working electrodes, Se@MICP, Super-P carbon black, and sodium alginate with a weight ratio of 80:10:10 were mixed into homogeneous slurry in water using mortar and pestle. The resulting slurry was pasted onto pure aluminum foil (99.0 %, Goodfellow) and then dried in a vacuum oven at 40 °C overnight. The electrolyte for all tests was 1 M LiPF<sub>6</sub> in ethylene carbonate/diethyl carbonate (1:1 v/v). Glass fibers (GF/D) from Whatman were used as separators and pure lithium metal foil (Aldrich) was utilized as the counter electrode. The coin cells were assembled in an argon-filled glove box (H<sub>2</sub>O, O<sub>2</sub> < 0.1 ppm, Mbraun). The charge and discharge measurements of the batteries were conducted on a Land CT2001A multi-channel battery testing system in the fixed voltage range of 1.0–3.0 V vs. Li<sup>+</sup>/Li at room temperature. Cyclic voltammetry (CV) and electrochemical impedance spectroscopy (EIS) were performed on a PARSTAT 4000 electrochemical workstation. CV was recorded at a scan rate of 0.1 mV s<sup>-1</sup> while EIS was determined in the frequency range from 100 kHz to 100 mHz.

## References

- 1 H. B. Wu, S. Wei, L. Zhang, R. Xu, H. H. Hng and X. W. Lou, *Chem. Eur. J.*, 2013, **19**, 10804–10808.
- 2 J. Cravillon, R. Nayuk, S. Springer, A. Feldhoff, K. Huber and M. Wiebcke, *Chem. Mater.*, 2011, **23**, 2130–2141.

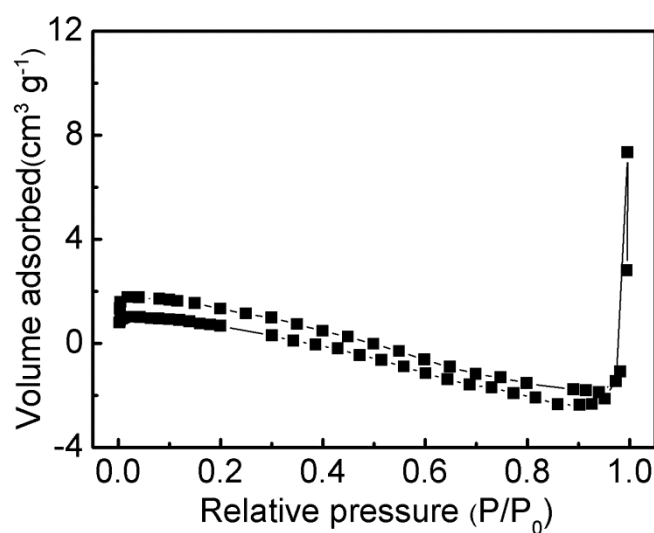

**Figure S1.** Nitrogen adsorption/desorption isotherms of Se@MICP (Brunauer–Emmett–Teller surface area = 0.98 m<sup>2</sup> g<sup>-1</sup>).

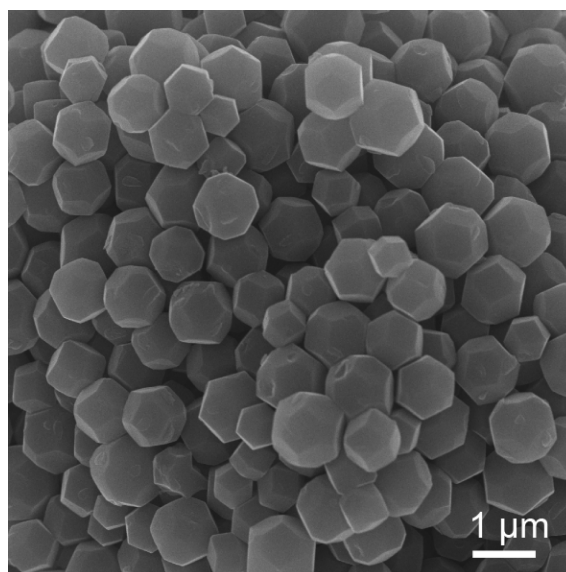

**Figure S2.** SEM image of MICP.

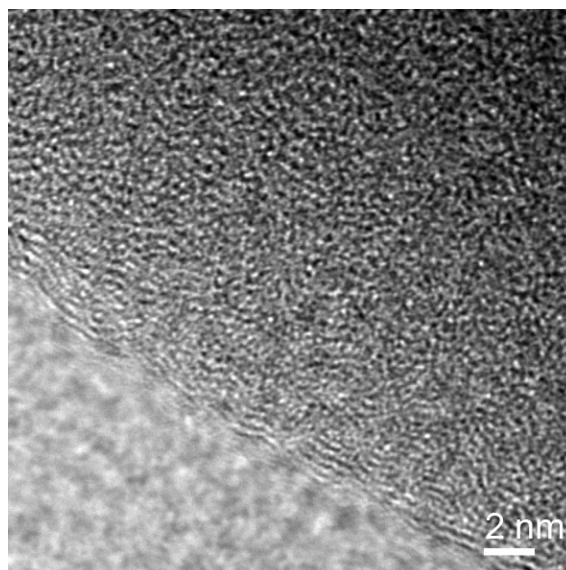

**Figure S3.** HRTEM image of Se@MICP.

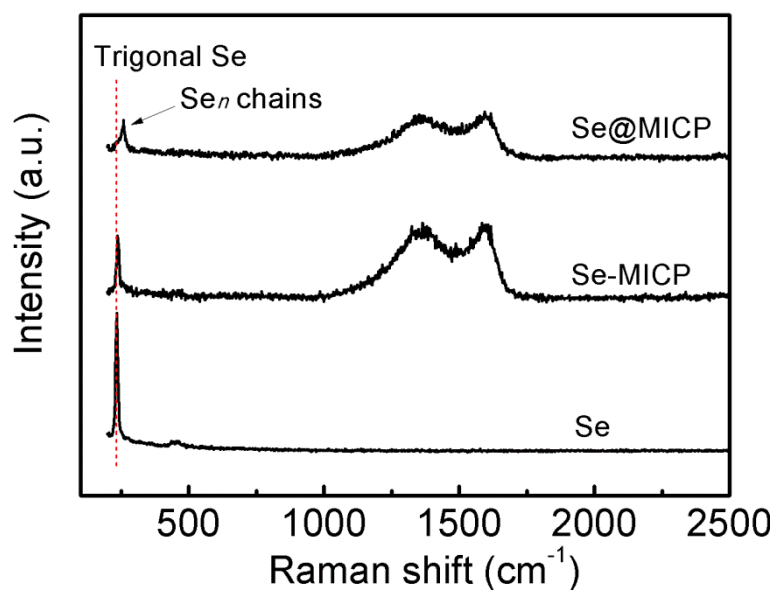

**Figure S4.** Raman spectra of Se, Se-MICP, and Se@MICP.

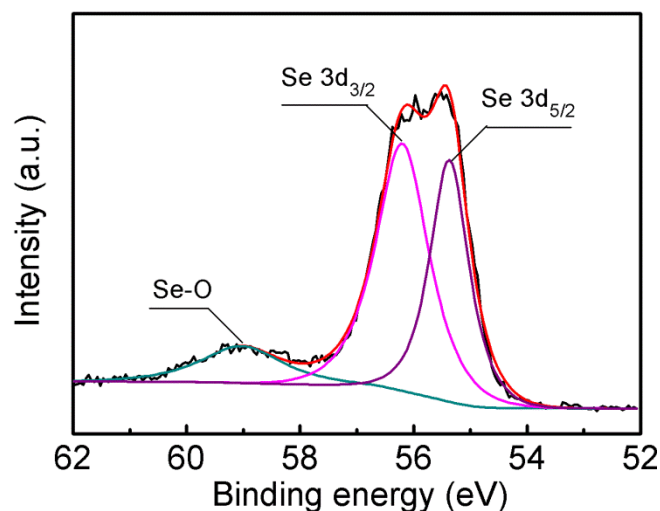

**Figure S5.** Se 3d XPS spectrum of Se@MICP. It could be splitted into three peaks at 55.4, 56.2, and 59.0 eV, respectively. The peaks at 55.4 and 56.2 eV are ascribed to Se 3d<sub>5/2</sub> and Se 3d<sub>3/2</sub>, respectively. The third peak at 59.0 eV is attributed to Se–O bonding, confirming the generation of SeO<sub>2</sub>.

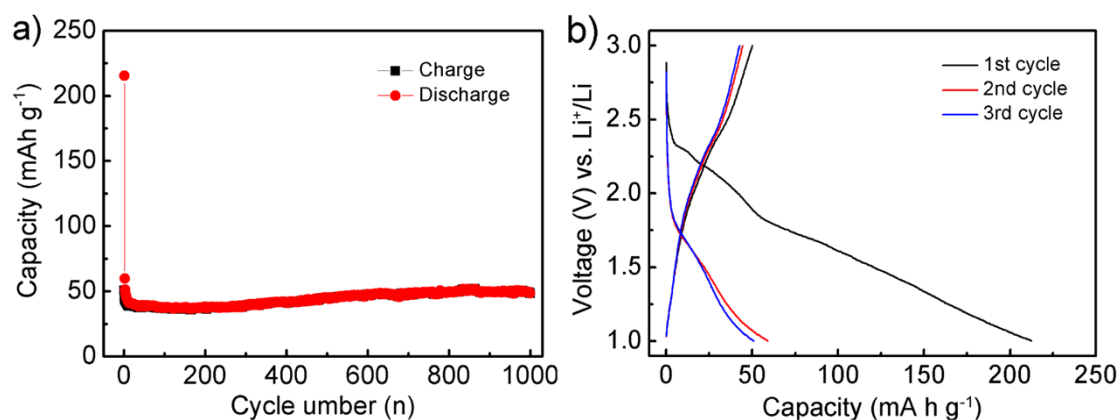

**Figure S6.** (a) Cycling performance and (b) galvanostatic charge-discharge profiles for the initial three cycles of Se-MICP at 0.1 C (67.8 mA g<sup>-1</sup>) in the voltage range of 1.0–3.0 V vs. Li<sup>+</sup>/Li.

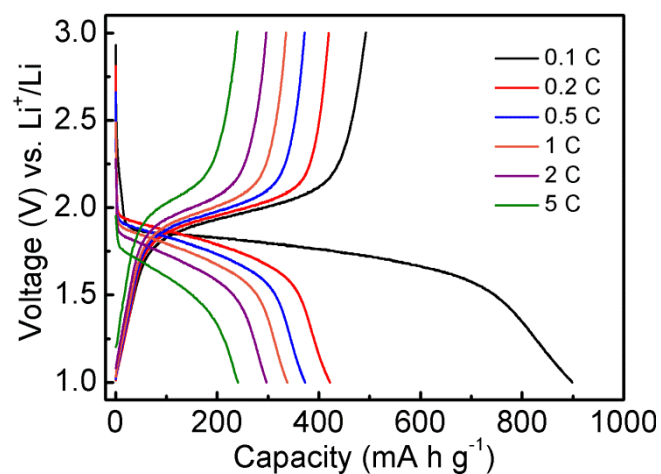

**Figure S7.** Galvanostatic charge-discharge profiles of Se@MICP at various current densities in the voltage range of 1–3 V vs.  $\text{Li}^+/\text{Li}$ .

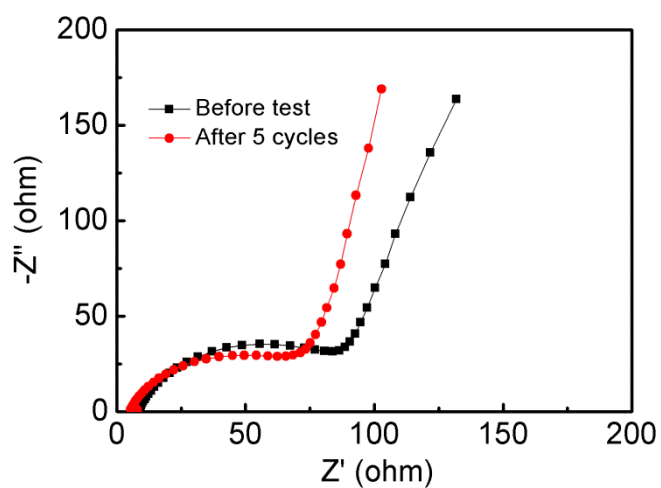

**Figure S8.** Nyquist plots of Se@MICP before test and after 5 cycles achieved by applying a sine wave with amplitude of 10.0 mV over the frequency range of 100 kHz–100 mHz.
